## RESEARCH ARTICLE

## Does globalization and ecological footprint in OECD lead to national happiness

Yueying Wang<sup>1</sup>, Noman Arshed<sup>2\*</sup>, Muhammad Ghulam Shabeer<sup>3</sup>, Mubbasher Munir<sup>3\*</sup>, Hafeez ur Rehman<sup>3</sup>, Yousaf Ali Khan<sup>4\*</sup>

**1** School of Business, Gachon University, Seongnam-si, Korea, **2** Department of Economics, Division of Management and Administrative Science, University of Education, Lahore, Pakistan, **3** Department of Economics and Statistics, Dr Hasan Murad School of Management, University of Management and Technology, Lahore, Pakistan, **4** Department of Mathematics and Statistics, Hazara University, Mansehra, Pakistan

\* [noman.arshed@ue.edu.pk](mailto:noman.arshed@ue.edu.pk) (NA); [mubbasher.munir@umt.edu.pk](mailto:mubbasher.munir@umt.edu.pk) (MM); [yousaf\\_hu@yahoo.com](mailto:yousaf_hu@yahoo.com) (YAK)

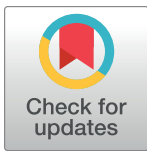

## OPEN ACCESS

**Citation:** Wang Y, Arshed N, Ghulam Shabeer M, Munir M, Rehman Hu, Khan YA (2023) Does globalization and ecological footprint in OECD lead to national happiness. PLoS ONE 18(10): e0288630. <https://doi.org/10.1371/journal.pone.0288630>

**Editor:** Valentina Diana Rusu, Alexandru Ioan Cuza University: Universitatea Alexandru Ioan Cuza, ROMANIA

**Received:** October 6, 2022

**Accepted:** July 2, 2023

**Published:** October 24, 2023

**Copyright:** © 2023 Wang et al. This is an open access article distributed under the terms of the [Creative Commons Attribution License](https://creativecommons.org/licenses/by/4.0/), which permits unrestricted use, distribution, and reproduction in any medium, provided the original author and source are credited.

**Data Availability Statement:** Details about data used in this research is explain in data section of this paper sources of which are provided in [Table 1](#).

**Funding:** This research was supported by The National Social Science Fund of China (Grant. No.21BJY217). Furthermore, The funders had no role in study design, data collection and analysis, decision to publish, or preparation of the manuscript.

## Abstract

This study examines the relationship between globalization, ecological footprint, innovation, and subjective wellbeing in the form of happiness, using a comprehensive assessment of OECD countries from 2008 to 2020. The study employs FGLS, Quantile, and Bootstrap Quantile regression estimation to investigate the quadratic effects of globalization, ecological footprint, and the moderating effect of innovation while controlling for renewable energy and population density. Happiness is a multidisciplinary subject, and this study focuses on the economic dimensions of happiness. The findings reveal a nonlinear relationship between ecological footprint and globalization, with negative effects on subjective wellbeing at high levels of ecological footprint and globalization. However, the moderating effect of innovation mitigates these adverse effects, indicating that innovation can help to offset the detrimental impacts of ecological footprint and globalization on subjective wellbeing. The study's implications are significant for policymakers promoting sustainable economic growth while enhancing subjective wellbeing. The findings highlight the importance of investing in innovation and sustainable development to promote subjective wellbeing in the face of increasing ecological footprint and globalization. Additionally, this research contributes to the multidisciplinary understanding of happiness and provides valuable insights for future research in this area.

## 1. Introduction

Finding happiness is one of life's most difficult tasks. However, what does the term "happiness" truly mean? Is it even quantifiable? The positive thinking movement has addressed these and other questions, a recent attempt to scientifically investigate happiness. Determining who is happy and why is a typical first step in analyzing happiness. One of the most significant factors affecting an individual's happiness in life is their personality. Personality traits affect how people perceive and act and navigate the world. Personality characteristics affect how people perceive the world, behave, and navigate through life. Extraversion, conscientiousness, agreeableness, and neuroticism are the five fundamental components of the Five-Factor Model

**Competing interests:** The authors have declared that no competing interests exist.

of personality, which is based on a time-tested characteristic model. This empirically grounded paradigm has been combined with the relatively new trend of positive psychology to investigate how personality traits affect people's overall satisfaction. Although neuroticism and extraversion strongly correlate with individual satisfaction measures, this correlation is moderated by intrinsic and extrinsic factors in a person's life. McAdams and Dale [1], Albuquerque et al. [2], Luhmann et al. [3], Soto [4], Suldo et al. [5], Kirkland et al. [6]. Soto [4] concluded that people's happiness was contingent on their careers, family life, and romantic relationships.

Apart from personality traits, external factors also contribute to an individual's happiness. But first, what is happiness, and how can it be quantified? Happiness is defined as an emotional state of joy, fulfillment, and contentment accompanied by positive feelings. Aristotle is credited with coining the terms "Hedonia" and "Eudaimonia" to refer to two distinct types of happiness. Pleasure is the source of hedonic happiness, and it is most frequently associated with doing what makes you happy, self-care, fulfilling wishes, having fun, and feeling content. Eudaimonia, on the other hand, is associated with the pursuit of virtue and purpose. It is critical to have a sense of meaning and worth in your life in order to accomplish certain goals [7]. The psychologist has added a third dimension, which he refers to as engagement.

Now the question of how to quantify happiness arises. In the 1780s, Jeremy Bentham made an early attempt. Later, several methods for measuring happiness were developed, including Gross National Happiness (GNH) in 1972, the Satisfaction with Life Scale (SWLS) in 1985 [8], the Positive and Negative Affect Schedule (PANA) in 1988 [9], the Subjective Happiness Scale (SHS) in 1999 [10], and development of Better Life Index by Mizobuchi [11].

This study used the World Happiness Report by Helliwell et al. [12] to quantify happiness. The United Nations Sustainable Development Solutions Network publishes this report (SDSN). Fig 1 depicts the ranking of the OECD countries, which served as the panel for this study. According to the literature, several primary factors contribute to happiness, including biological, personal, relational, institutional, societal, and environmental factors. Ryff [13] proposed six factors associated with wellbeing (self-acceptance, personal growth, positive relations with others, environmental mastery, autonomy, and purpose). Keyes [14], on the other hand, proposed five dimensions of happiness and wellbeing: social integration, social

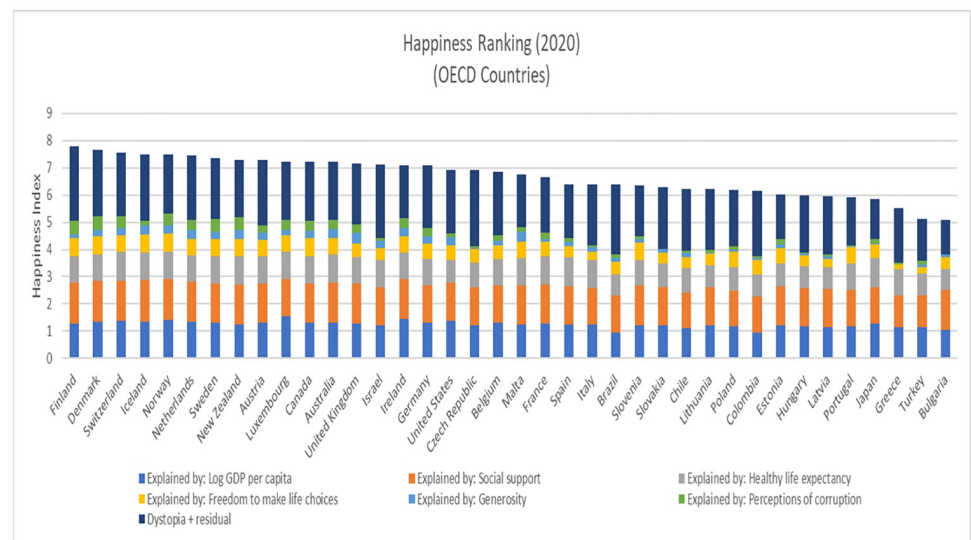

**Fig 1. Happiness ranking.** Made by Authors, data from WHR.

<https://doi.org/10.1371/journal.pone.0288630.g001>

acceptance, social contribution, social actualization, and social coherence. Diener [15], Seligman and Csikszentmihalyi [16], and others have emphasized the importance of positive psychology.

Happiness economics is concerned with various factors contributing to happiness, including the gross domestic product, individual income, employment, social security, leisure, economic security, and economic freedom. There are conflicting findings regarding the contribution of such factors. Easterlin [17] established that there is no correlation between income and happiness, and subsequent research has confirmed this [8, 18–20]. Graham and Pettinato [21], Blanchflower and Oswald [22], Shields and Price [23], Lelkes [24], Deaton [25], and Stevenson and Wolfers [26], on the other hand, concluded that life satisfaction increases with income. According to Tella and MacCulloch [27], income increases contribute to happiness growth up to a point, after which income increases do not contribute to happiness growth. According to Frey and Stutzer [28], people in developing countries are happier as a result of reduced stress and increased access to natural resources. According to Kahneman et al. [29], it is possible for someone to have more resources but be unhappy. Arshed et al. [18] studied 33 Asian countries and concluded that institutions, money, open trade, and employment contribute to national happiness.

In the field of happiness economics, this study examined several factors influencing happiness, including innovation, ecological footprint, globalization, environmentally friendly energy, and population density. The square form of ecological footprint and globalization is used to quantify these factors' quadratic impact. Additionally, the moderating effects of innovation and ecological footprint are estimated. It can be written in question form as:

- What is the nature of the effect of the ecological footprint on happiness, and is it constant returns to scale?
- What is the nature of the effect of globalization on happiness, and is it constant returns to scale?
- Does eco-friendly fuel use increase happiness?
- Does human socialization proximity affect happiness?
- What is the nature of the effect of innovation on happiness, and can it moderate the ecological footprint?

This study's objective is to guide governments on how to achieve the goal of "happy people" by evaluating the impact of innovation and the ecological footprint on happiness. The study aims to fill the gaps in previous research by examining the quadratic effects of ecological footprint, globalization, and innovation's moderating effect, using a comprehensive assessment of OECD countries between 2008 and 2020. The novelty of this study lies in its exploration of the nonlinear relationship between ecological footprint and globalization and its focus on the role of innovation in mitigating the adverse effects of these factors on subjective wellbeing.

This research also pioneers a new approach by creating a composite index for innovation that considers nine technological variables from the World Bank's World Development Indicators, providing a more accurate measure of the true impact of innovation. The findings of this study will be of great value to policymakers seeking to promote sustainable economic growth while enhancing subjective wellbeing, by providing insights on how to balance the economic benefits of globalization and innovation with the ecological footprint, and the trade-offs that policymakers need to consider when designing policies to enhance national welfare.

## 2. Literature review

### 2.1. Resource utilization intensity and happiness

Although humans derive utility from resource consumption, an increase in the volume of resource consumption will deter the ecosystem [30, 31]. Thus, when looking at the long term, a decline in resource sustainability may reduce the ease with which resources can be converted to utility. Countries in Europe and other developed countries are placing effort to fulfill environmental commitments and reducing footprints [32, 33].

Few studies have examined the relationship between ecological footprint, resource use, and happiness. Wackernagel and Rees [34] noted that intelligent life, such as a human beings, should be aware of its ecological footprint, quoting: "if having overshoot carrying capacity, we cannot avoid the crash, perhaps with an ecological understanding of its real cause, we can remain human in circumstances that could otherwise tempt us to turn beastly". According to Veenhoeven [35], sustainable consumption would increase long-term satisfaction for a large number of people, which is one of the reasons for advocating for it. According to the facts, transitioning to sustainable consumption may temporarily decrease satisfaction, but we can still live happily with less luxury. Sustainable consumption practices by the current generation will benefit future generations by averting major ecological disasters and alleviating poverty caused by resource depletion. Sustainable consumption can be justified morally by focusing on the intrinsic value of the goods it seeks to protect rather than on human enjoyment. Despite widespread acceptance of the "consumption model," mounting evidence suggests that happiness does not increase in lockstep with economic growth [36, 37].

O'Brien [38] proposed a national goal of sustainable happiness rather than merely happiness. Sustainable happiness is defined as happiness that is not based on the exploitation of nature, the environment, people, or the next generation. He advocated for livable neighborhoods, child-friendly societies, and universal education. Caldas [39] concluded that lavish spending on goods and services is not necessary for happiness and that the struggle to earn money deteriorates. Rasheed et al. [40] used panel data from developed countries to examine the relationship between happiness, ecological footprint, total factor productivity, and employment. They concluded that there is no correlation between happiness and factor productivity and that results on happiness and ecological footprint were mixed in sub-panels. Verhofstadt et al. [41] established a link between the ecological footprint and subjective wellbeing in Western societies where citizens engage in consumption behaviors that exceed the ecological footprint. They discovered that the ecological footprint has a detrimental effect on subjective wellbeing. Demographic factors such as social and family life, a pleasant environment, and home ownership all contributed to happiness. Ambrey and Daniels [42] concluded that a larger carbon footprint linearly reduces happiness and discovered a correlation between happiness, the happy planet index, ecological footprint, population, and life expectancy.

According to Quak and Luetz [43], economic growth and its associated benefits, such as materialism and the capacity to consume, are the primary sources of human happiness. Happiness increases as consumption and income increase, as measured by indicators such as a country's GDP per capita. This traditional view is widely accepted, and over 30 years of Human Development Reports, including those published by the United Nations, substantiate this view. Alves-Pinto and Giannetti [44] examined the relationship between environmental impact, happiness, and academic performance. The author's ecological footprint index was calculated based on his consumption of various items, including meat, fish, fruits, dairy, transportation, and housing. They concluded that increased consumption has a small but significant effect on happiness. Wu [45] concluded from 101 countries that while carbon footprint is negatively associated with happiness, wealthy countries experience higher happiness levels.

Zhang et al. [46] examined data from 101 countries spanning the years 2006 to 2016 and concluded that an ecological footprint significantly positively affects subjective wellbeing (happiness). Additionally, they concluded that developed countries' ecological carbon footprint (ECF) has a negative effect.

This study proposes that the ecological footprint has a nonlinear effect on happiness. Because increasing one's footprint reduces sustainability, and the subjective scale of happiness used includes community and family happiness. Thus, it is expected to increase happiness at low levels of footprint, while decreasing happiness at high levels of footprint.

## 2.2. Globalization and happiness

Globalization, particularly in the trade realm, enables nations to consume more than their domestic capacity [47]. Consumption growth is comparable to an increase in community utility and subjective happiness. Graham [36] noted that while there is considerable debate about the material effects of globalization, such as economic growth and poverty reduction, quantitative research places a greater emphasis on the non-material aspects of human life that may be impacted by globalization, such as individual perceived and actual welfare, insecurity, and vulnerability. He believed that globalization does not promote individual welfare on an individual level.

Sakurai [48] examined national identity and happiness in Japan and Bhutan during the globalization era and concluded that globalization has a beneficial effect. This effect, however, is highly dependent on the educational system, with family values and patriotism playing a significant role. Freeman and Jackson [49] examined the Bhutanese government's Gross National Happiness initiative and concluded that promoting happiness through globalization, tourism, and improved communication with other countries was desirable. Lin et al. [50] used 2SLS to examine the effect of globalization on happiness levels in 145 countries. They examined spillover effects and concluded that developing countries experience less happiness inequality than developed countries. Sajjad et al. [51] conducted a study in 125 countries on the relationship between globalization and happiness and discovered a link between globalization, happiness, and entrepreneurship.

Other scholars who are worked on globalization and happiness are Bauman [52], Tomlinson [53], O'Rourke and Williamson [54], Castles and Davidson [55], Inglehart [56], Giddens [57], Graham [36], Lee and Tai [58], Stiglitz [59], Gorniak-Kocikowska [60], Hummels [61], Zhao [62], Blommaert [63], Holton [64], Tashimova and Rizulla [65], Sakurai [48], Lee [66], Freeman and Jackson [49], Spring [67], Fukuyama [68], Amin [69], Enloe [70], Lin et al. [50], Steger [71], Seidlinger [72], Beck [73], Jermsittiparsert and Sriyakul [74], and Arshed et al. [18]. Based on these studies, globalization is expected to have a nonlinear effect on happiness.

## 2.3. Energy consumption and happiness

Our daily lives require energy, from morning showering to sleeping in a cool or warm nighttime environment. Is it a factor in happiness? It was first investigated in the 1980s. Energy did play an important role in motivating economic growth globally [75]. Leprince-Ringuet [76] established a link between innovation, energy, and happiness in his book "Energy and Happiness." Countries have pursued unrestricted scientific advancement since World War II. In recent years, incredible implementations have followed basic science. Individuals live longer, their children mature, and mothers no longer die during childbirth. There is no risk of starvation, hunger, or malnutrition when food intake is balanced. Energy is ubiquitous; it is found in electricity, motors, refrigerators, and technology for preserving and transporting perishable goods, as well as in the office and home.

Additionally, a revolution in communications has occurred. Everything a person could desire in terms of personal, intellectual, artistic, and cultural culture and knowledge is readily available. Rapid modes of transportation have increased in popularity, providing travelers with virtually limitless travel options. All of this has aided people in living happier and longer lives.

Afia [77] examined the relationship between energy use, happiness, and economic growth. She examined the direct and indirect effects of energy consumption on happiness in 47 countries over a 14-year period and concluded that energy consumption benefits happiness. Aldieri et al. [78] investigated environmental innovation and its effect on happiness, and their findings indicated that eco-innovation positively affected happiness in ten European countries from 1981 to 2011. The percentage of renewable energy in total energy was used as a proxy for eco-innovation. A study by Pata and Kartal [79] showed that use of renewable energy improves environment under load capacity curve hypothesis in South Korea. Similar case is with technology [80] and a negative role of clean energy on ecological footprint is also confirmed [81].

## 2.4. Human socialization proximity and happiness

The human being is a social animal; as such, he tends to derive utility from social interaction. Increased population density is associated with increased opportunities for social interaction, which has been shown to increase subjective happiness. On the other hand, increased population density degrades the distribution and quality of available resources. Malthus [82] explains in his article that overpopulation is dangerous because resources do not grow at the same rate as the human population. Ecological footprints are a modern interpretation of Malthus's concerns.

Additionally, Pankaj and Dorji [83] concluded that rural areas are happier than cities. On the other hand, rural education has a negative correlation with happiness, whereas urban education has a positive correlation. Rural areas benefit more from religious and cultural participation than urban areas, and religious and cultural participants are happier than non-participants. Berry and Okulicz-Kozaryn [84] examined the urban-rural happiness gradient in the United States of America from 1972 to 2008 and discovered that the least happy population lived in the heart of large cities while the happiest people lived in the smallest towns. Jiang et al. [85] examined China's urban society and discovered that a sense of inequality had reduced the urban population's happiness. Easterlin et al. [86] examined data from 80 countries and concluded that average happiness increases with economic growth in agricultural societies. Simultaneously, Burger et al. [87] explained that while there may be a point where the urban and rural populations have the same happiness index, the majority of data indicates that the rural population is happier.

## 2.5. Innovation and happiness

Innovation sheds light on novel ways and methods of accomplishing tasks. Through innovation, nations can enhance their capacity for production and sustainability. Engelbrecht [88] examined the relationship between the knowledge-based economy, innovation, and wellbeing in OECD countries. Primarily, knowledge and innovation have a positive effect on happiness. It is argued that because happiness is the ultimate goal of human beings, growth should prioritize material wellbeing as well as other forms of happiness, such as mental, social, and spiritual wellbeing. As a result, public policies are redesigned to promote individual and societal wellbeing. To accomplish this, research and innovation are required. According to Hojman [89], the correlation between innovation and happiness may be deceptive. Quality of life is a multifaceted concept influenced by personal, social, institutional, cultural, and governance factors

rather than technological factors. He concluded that while technology increases economic growth, it does not always result in happiness.

Maurseth [90] examined the impact of information technology on growth and happiness and concluded that ICT has a positive effect on both. Shamsi et al. [91] examined the relationship between innovation, smart government, and happiness, concluding that innovation, as a mediator between the smart government and happiness, increases happiness by facilitating improved communication with the government. Mochon [92] examined the relationship between technology and happiness and argued that regulation is necessary to maximize the positive effects of technology while mitigating their adverse effects on social wellbeing. The internet has transformed our lives, but we are only now beginning to see its dark side. Millions of people have lost productivity, sleep, and inspiration as a result of technology's constant interruptions, which were supposed to improve life. We recognize that unregulated technological use is increasingly diverting our attention away from our goals, but we appear powerless to intervene. Through information flooding, information technology harms the human brain and psychology. Depression, inattention, and a lack of empathy all contribute to unhappiness. Netizens are constantly being used as pawns and puppets by IT innovators to further the benefit motives of their creators. Both producers and consumers of information technology goods and services will require a balanced approach in the future [93].

Aldieri et al. [94] pointed out a lack of research on innovation and subjective wellbeing and explained the four channels through which happiness is influenced by innovation, income, inequality, and unemployment. Over 30 years of study of eight European countries suggest that innovation (number of patents) negatively impacts income inequality, and they found that technology leads to unemployment that decreases happiness.

Studies like [95] showed that technological innovation does help in managing the ecological footprint in high nuclear energy-intensive countries, greenhouse gasses in Mercosur economies [96], and CO2 emissions in Africa [97], which eventually helps in achieving sustainability ecologically [98].

### 3. Methodology

#### 3.1. Sample of the study

This study covers all OECD member countries from 2008 to 2020. The sample countries are provided in [S1 Appendix](#). Because the OECD countries are well-established and have achieved some economic growth, they need to focus on their citizens' happiness rather than on economic growth. This study provides a comprehensive economic and social indicator applicable to developed countries and assesses their effects on subjective wellbeing. The data for ecological footprints is available till 2018, this study has used the AR equation method to forecast the data till 2020.

#### 3.2. Functional form

Happiness is analyzed with the following equation. These symbols are explained in [Table 1](#). Following are the transformations applied to the data. The innovation data is an index of 9 variables. Population density, and renewable energy are in natural log form, and the quadratic transformation are used for ecological footprint and globalization.

$$HI_{it} = \alpha_1 + \alpha_2 EFP_{it} + \alpha_3 EFP_{it}^2 + \alpha_4 GLO_{it} + \alpha_5 GLO_{it}^2 + \alpha_6 REN_{it} + \alpha_7 PDN_{it} + \alpha_8 TEC_{it} + \alpha_9 EFP * TEC_{it} + \varepsilon_{it} \quad (1)$$

Table 1. Table of the variables.

| Name                         | Symbol | Explanation                                                                           | Source                           |
|------------------------------|--------|---------------------------------------------------------------------------------------|----------------------------------|
| Happiness Index              | HI     | Happiness score of panel data                                                         | World happiness report           |
| Ecological footprint         | EFP    | Human demand compared to natural resource capital                                     | Ecological Footprint Report 2020 |
| Globalization                | GLO    | Kof index of Globalization                                                            | KOF Index                        |
| Renewable energy consumption | REN    | Log form of renewable energy consumption as a percentage of total energy consumption. | WDI                              |
| Population density           | PDN    | Log form of population density                                                        | WDI                              |
| Innovation                   | TEC    | Index in SPSS from 9 variables. see (3.3.5)                                           | WDI                              |

<https://doi.org/10.1371/journal.pone.0288630.t001>

### 3.3. Explanation of the variables and their graphs

**3.3.1. Ecological footprint.** Nature's demand and supply are quantified using the ecological footprint. A value of one indicates that demand is perfectly balanced with natural supply. A value greater than one indicates excessive resource consumption. The average ecological footprint of the world is 1.7. Fig 2 illustrates the relationship between ecological footprint and happiness. The correlation between these two variables supports the study's hypothesis.

**3.3.2. Globalization.** In the Interest of Globalization, economic, trade, finance, cultural, interpersonal, political, informational, and social globalization are all included in the Kof index. Fig 3 illustrates the relationship between globalization and happiness. This U-shaped association demonstrates that the hypothesis advanced in this study is consistent with the conclusions reached in [99].

**3.3.3. Renewable energy consumption.** Renewable energy is calculated as a percentage of total energy consumption. Fig 4 illustrates the positive correlation between renewable energy and happiness.

**3.3.4. Population density.** The analysis is conducted using renewable energy as a percentage of total energy consumption. The Fig 5 illustrates the positive relationship between renewable energy and happiness.

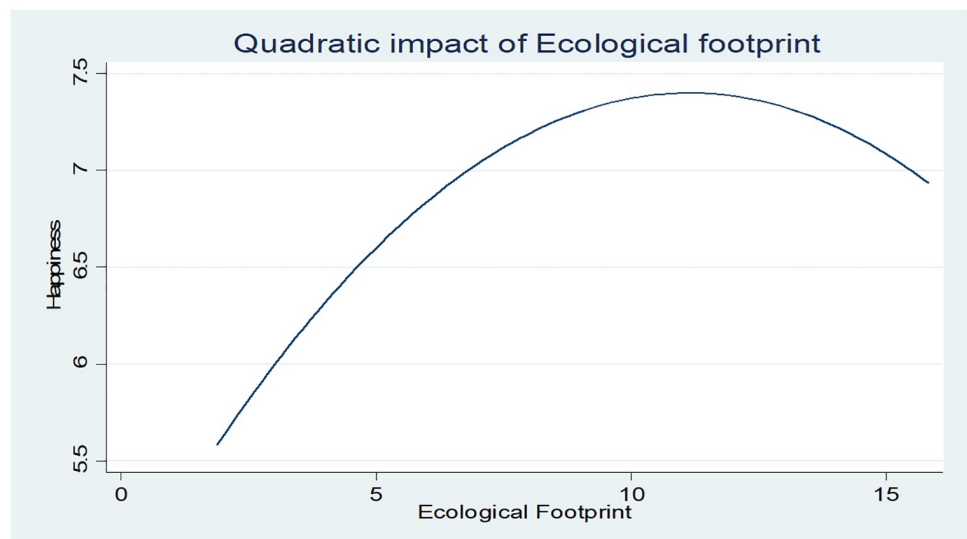

Fig 2. Quadratic impact of ecological footprint.

<https://doi.org/10.1371/journal.pone.0288630.g002>



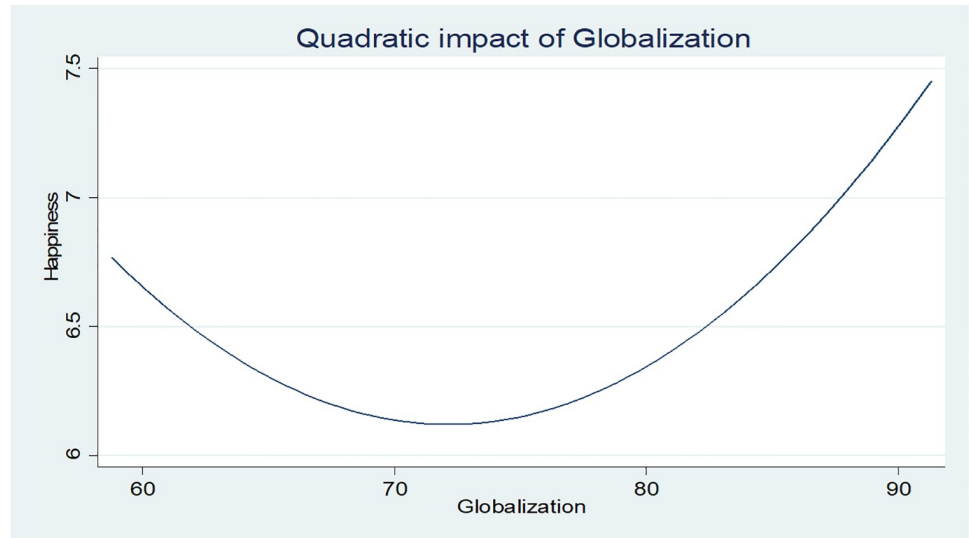

**Fig 3. Quadratic impact of globalization.**

<https://doi.org/10.1371/journal.pone.0288630.g003>

**3.3.5. Innovation index.** As discussed in the literature, innovation may or may not directly increase happiness. This is typically due to the proxy used to measure innovation and technology, but this study attempts to incorporate all possible proxies for innovation contained in the World Bank's WDI data. The innovation index is constructed using the following variables.

- Total Trademark applications
- Scientific and technical journal articles
- Total Patent applications

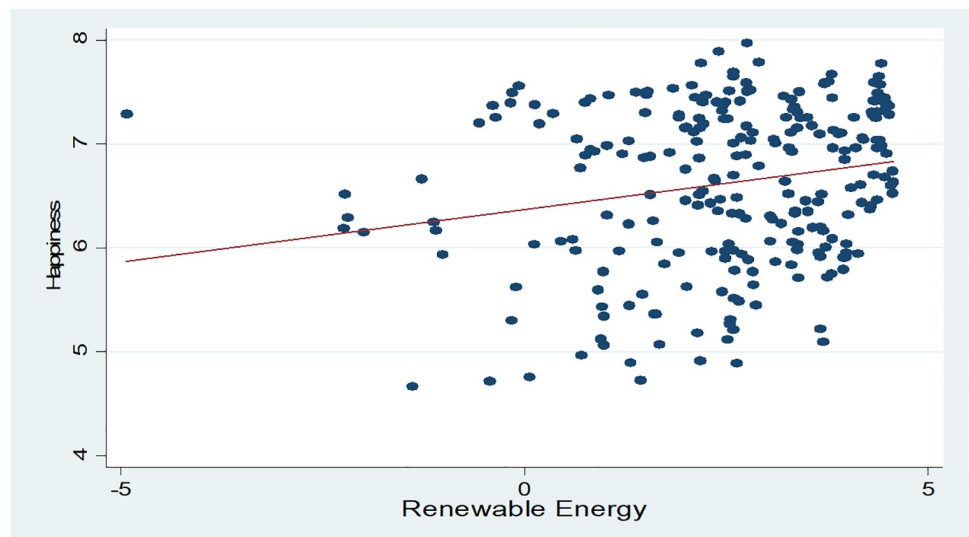

**Fig 4. Trend of renewable energy.**

<https://doi.org/10.1371/journal.pone.0288630.g004>

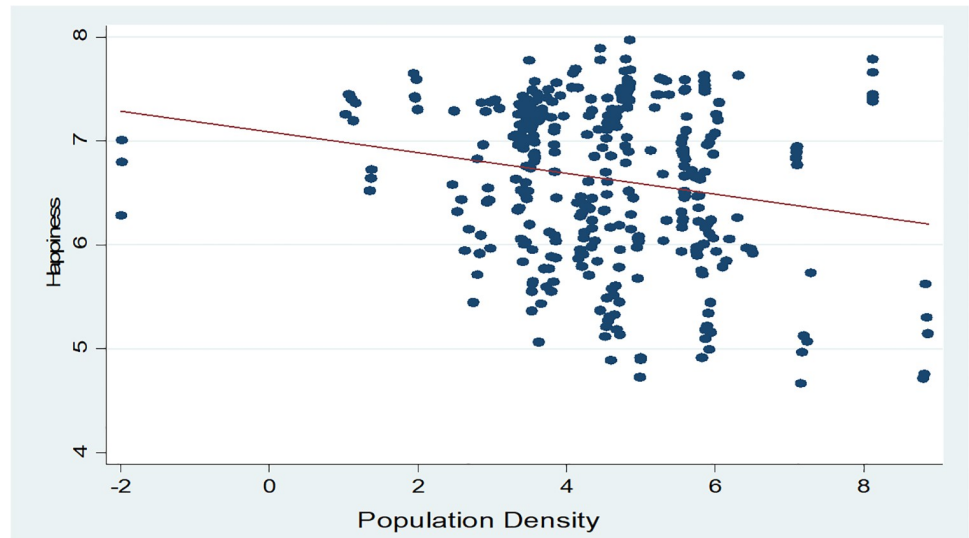

**Fig 5. Trend of population density.**

<https://doi.org/10.1371/journal.pone.0288630.g005>

- Mobile cellular subscriptions
- Individuals using the internet (% of the population)
- Research and development expenditure as a percentage of GDP
- Industrial design applications, total
- Researchers in R&D (per million people)
- Technicians in R&D (per million people)

Fig 6 illustrates the positive correlation between innovation and happiness. SPSS is used to create an index of innovation using the Principal Axis Factoring technique. Its KMO tests indicate that it has a sample adequacy of 0.674, which is greater than 0.60 and thus suitable for estimation. The significance of Bartlett's test is that it demonstrates that sufficient variation exists in the data to create indexes. The total variance test indicates that the index explains the variance, and the model is 73 percent simple with only a 27% reduction in efficiency.

Since the data are cross-sectional and temporal, simple regression would split residuals into cross-section and time series-specific variation, causing heteroskedasticity in the estimates. This study employs a robust form of Panel data modeling known as Feasible Generalized Least Squares. Additionally, the variables are expected to be statistically non-normal, and quantile and bootstrap regression models are used. The estimation of these models is used to investigate the estimates' robustness and sensitivity. These models can address unobserved heterogeneity, outliers, and skewness, and while comparing across models, it can provide a robust assessment of marginal effects.

## 4. Estimation and discussion

### 4.1. Descriptive statistics

The descriptive statistics provide an overview of the data's nature, and Table 2 details the number of observations, mean, standard deviation, minimum and maximum values.

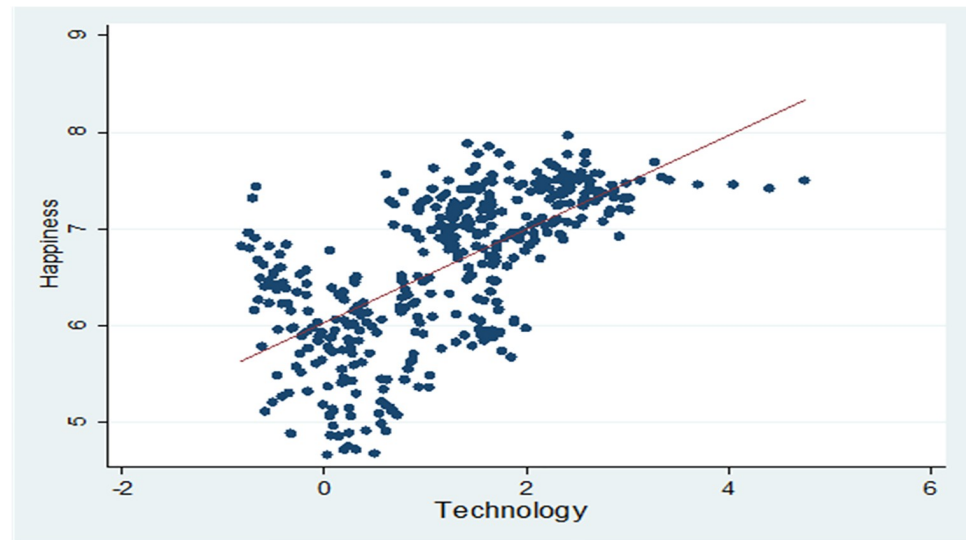

Fig 6. Correlation plot of happiness and technology.

<https://doi.org/10.1371/journal.pone.0288630.g006>

## 4.2. Matrix of correlation

Correlation matrix illustrating the quantitative relationship between all selected variables. According to Table 3, there is no significant relationship between the independent variables.

## 4.3. Regression results

The estimation results are summarized in Table 4. In this case, the ecological footprint benefits the happiness of the citizens of OECD countries. Consumption of goods and services generates joy and fulfillment, which increases their satisfaction. It should be noted that the public's demand is not limited to food and housing. The OECD countries' citizens spend a more significant proportion of their income on leisure activities that increase their level of satisfaction. However, there is a point at which the square of the ecological footprint has a detrimental effect on all estimations. The negative coefficient indicates that happiness declines when the ecological footprint exceeds a certain threshold. Because the ecological footprint considers the demand for natural resources, it limits happiness due to resource scarcity. Excessive demand for goods and services puts pressure on nature and the environment, deteriorating the quality of life and joy of those living there. This summarizes the ecological footprint's inverted U-shaped effect on happiness. The quadratic impact of ecological footprint is a novel feature of

Table 2. Descriptive statistics.

| Variable | Obs | Mean     | Std. Dev. | Min       | Max      |
|----------|-----|----------|-----------|-----------|----------|
| HI       | 435 | 6.618082 | .774037   | 4.668911  | 7.970892 |
| EFP      | 414 | 5.277391 | 1.972242  | 1.89      | 15.82    |
| GLO      | 435 | 81.83168 | 6.592529  | 58.78956  | 91.29425 |
| REN      | 252 | 2.515509 | 1.558713  | -4.925888 | 4.574906 |
| PDN      | 353 | 4.517833 | 1.49695   | -1.989869 | 8.859323 |
| TEC      | 415 | 1.196794 | 1.035247  | -.82065   | 4.75575  |

<https://doi.org/10.1371/journal.pone.0288630.t002>

Table 3. Matrix of correlation.

|      | HI      | EFP     | GLO     | REN     | PDN     | TEC    |
|------|---------|---------|---------|---------|---------|--------|
| HI   | 1.0000  |         |         |         |         |        |
| EFP  | 0.4147  | 1.0000  |         |         |         |        |
| GLO  | 0.3949  | 0.4554  | 1.0000  |         |         |        |
| REN  | 0.2443  | 0.0683  | -0.1035 | 1.0000  |         |        |
| PDN  | -0.3248 | -0.1829 | 0.0010  | -0.3999 | 1.0000  |        |
| TECH | 0.6370  | 0.4625  | 0.6477  | -0.0576 | -0.0947 | 1.0000 |

<https://doi.org/10.1371/journal.pone.0288630.t003>

Table 4. Regression analysis.

| Variables        | FGLS         |       | Quantile Regression |       | Bootstrap Quantile Regression Analysis |       |
|------------------|--------------|-------|---------------------|-------|----------------------------------------|-------|
|                  | Coefficients | $P>t$ | Coefficients        | $P>t$ | Coefficients                           | $P>t$ |
| EFP              | 0.5316009    | 0.000 | 0.5724425           | 0.000 | 0.5724425                              | 0.000 |
| EFP <sup>2</sup> | -0.0449092   | 0.000 | -0.0442026          | 0.001 | -0.0442026                             | 0.000 |
| GLO              | -0.5637123   | 0.000 | -0.5756142          | 0.000 | -0.5756142                             | 0.000 |
| GLO <sup>2</sup> | 0.0035351    | 0.000 | 0.0036672           | 0.000 | 0.0036672                              | 0.000 |
| REN              | 0.0788835    | 0.001 | 0.0723686           | 0.012 | 0.0723686                              | 0.035 |
| PDN              | -0.0963592   | 0.000 | -0.1334053          | 0.000 | -0.1334053                             | 0.000 |
| TEC              | 0.1596697    | 0.054 | 0.1337264           | 0.185 | 0.1337264                              | 0.020 |
| TEC * EFP        | 0.008236     | 0.006 | 0.0067712           | 0.062 | 0.0067712                              | 0.000 |
| Intercept        | 27.1424      | 0.000 | 27.30916            | 0.000 | 27.30916                               | 0.000 |

<https://doi.org/10.1371/journal.pone.0288630.t004>

this study, as it also explains previous research. Some of them have demonstrated beneficial effects, such as Rasheed et al. [40], Ambrey and Daniels [42], Arshed et al. [100], Quak and Luetz [43], and Alves-Pinto and Giannetti [44], while others have demonstrated detrimental effects, such as Wackernagel and Rees [34], Wackernagel et al. [101], Veenhoeven [35], O'Brien [38], Caldas [39], Verhofstadt et al. [41].

Additionally, the positive coefficient of the cross-product of innovation and environmental footprint indicates that we can extract more happiness from technology's current resource balance. Engelbrecht [88], Maurseth [90], and Shamsi et al. [91] demonstrated that innovation and technology have a positive effect on happiness, whereas Mochon [92], Wadhwa and Palvia [93], and Luigi et al. [94] demonstrated that innovation has a negative effect on happiness. Hojman [89] argued that happiness is a multifaceted attitude and that innovation is irrelevant. The environmental footprint and technological moderation are consistent across all three models. Additionally, the following Fig 7 substantiates all of this.

According to the findings, globalization has a detrimental effect on people's happiness at low levels. The free movement of goods and services, labor, capital, culture, and political systems reduces unhappiness because the economy becomes more reliant on the fortunes of other countries, financial crises put pressure on people's income, cultural and social values are disrupted, and a lack of freedom to choose one's own separate political system initially reduces happiness. On the other hand, when globalization is high, initial shocks to the economy, cultural, and social systems are absorbed, social and cultural values become homogeneous, economies of all countries move in the same direction, and happiness increases. This relationship holds true across all models and can be summarized as a U-shaped relationship, as illustrated in Fig 8.

Sakurai [48], Sajjad et al. [51], and Graham [36] all support globalization's beneficial effects. According to Lin et al. [50], globalization has a negative effect. This study clarified why there is

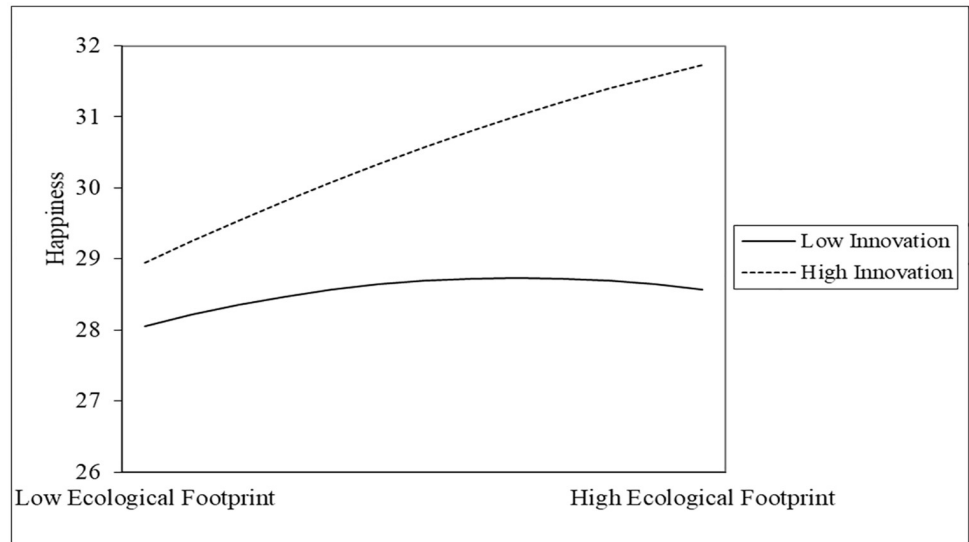

**Fig 7. Moderating effect of innovation on happiness.**

<https://doi.org/10.1371/journal.pone.0288630.g007>

a schism in opinion. Globalization’s initial stage is detrimental, while its later stage is beneficial, as demonstrated by [99] in the case of business competitiveness.

According to the findings, using eco-friendly (renewable) energy significantly increases happiness. According to this study’s estimation, increasing the log of renewable energy to total energy consumption by 1% increases happiness by 0.0789 percent using FGLS and 0.072 percent using quantile and bootstrap methods. These findings corroborate previous research by Leprince-Ringuet [76], Afia [77], and Aldieri et al. [78].

This study’s findings indicate that population density reduces happiness. If population density increases by 1%, happiness decreases by 0.096 percent using FGLS estimation and 0.13 percent using bootstrap estimation. The higher population density in some areas creates civic

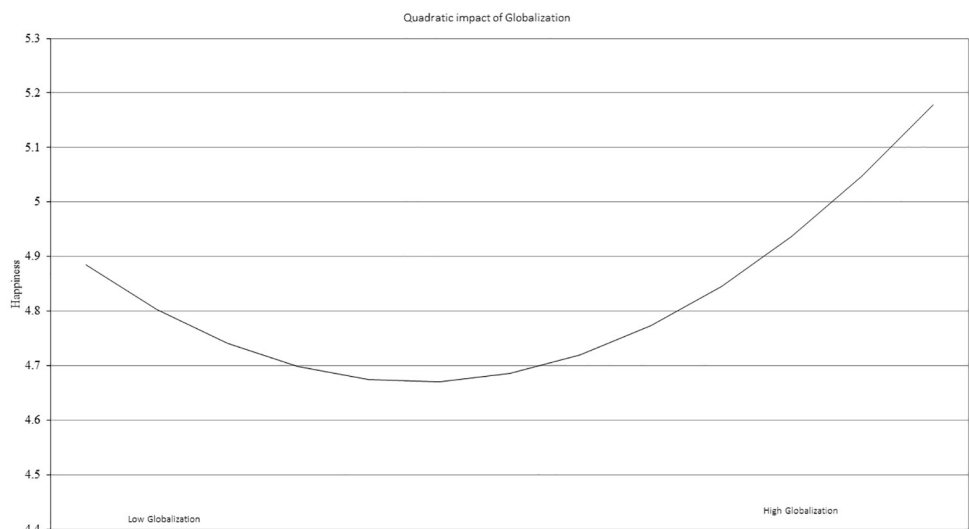

**Fig 8. Quadratic impact of globalization.**

<https://doi.org/10.1371/journal.pone.0288630.g008>

issues that detract from happiness, and housing issues and competition put them under daily pressure. Numerous studies, including Malthus [82], Pankaj and Dorji [83], Berry and Okulich-Kozaryn [84], Jiang et al. [85], Easterlin and Angelescu [102], Easterlin et al. [103], and Burger et al. [87], have emphasized this phenomenon.

## 5. Conclusion and policy implication

This study concludes that the primary goal of every nation should be to have a happier population, which was also recognized in a resolution adopted by the United Nations General Assembly in 2012, which stated that "the pursuit of happiness is a fundamental human goal." To maximize happiness, it is necessary to limit one's ecological footprint to a certain extent. If present footprints are not managed it will make difficult to sustain standard of living in future. This study proposes that if a nation is compelled to go beyond that, innovation must positively affect happiness by reducing the influence of footprints. Governments should invest in research and development projects and support academics and research institutes to increase happiness, which will reduce the ecological footprint without sacrificing happiness or other economic and environmental goals.

Globalization initially has a negative effect, but once it exceeds a certain threshold, it positively affects happiness. The access to trade and foreign resources can help nations achieve more. Governments must promote globalization in order to reap the benefits of happiness. Energy consumption should also be shifted away from fossil fuels and toward renewable energy, as renewable energy is both environmentally friendly and beneficial to human happiness. Every day, people require energy, regardless of its source. The government's role is to provide renewable energy or to facilitate the private sector's provision of renewable energy. Population density reduces happiness, and there is a need to regulate population concentration in certain areas. Governments facilitate industrial development in rural areas in order to reduce urban density. Industrial zones in small cities and agricultural advancements will alleviate pressure on large cities, resulting in a happier and more fulfilled populace.

These findings are restricted to the variables for which proxies have been chosen. There is a great deal of room for future research in happiness economics. Other measures of happiness can be used by researchers, including Gross National Happiness (GNH), the better life index, subjective wellbeing, and social progress reports. The term "globalization" can be used to refer to a subset of globalization, such as cultural or financial globalization. The countries included in the sample can be changed. Additional variables from the social, economic, political, psychological, and institutional spheres may be included. Apart from happiness economics, a psychological perspective suggests that happiness is more concerned with how events are perceived than with actual events. However, much remains unknown about how our expectations of happiness are formed and how much control individuals have over their life satisfaction. The final image consists of a plethora of characteristics, and happiness appears to be a difficult concept to grasp.

## Supporting information

**S1 Appendix.**  
(DOCX)

## Author Contributions

**Conceptualization:** Yueying Wang, Yousaf Ali Khan.

**Data curation:** Muhammad Ghulam Shabeer.

**Formal analysis:** Yueying Wang, Noman Arshed, Muhammad Ghulam Shabeer, Mubbasher Munir, Yousaf Ali Khan.

**Funding acquisition:** Yousaf Ali Khan.

**Investigation:** Muhammad Ghulam Shabeer, Mubbasher Munir, Hafeez ur Rehman, Yousaf Ali Khan.

**Methodology:** Yousaf Ali Khan.

**Project administration:** Hafeez ur Rehman.

**Resources:** Noman Arshed, Mubbasher Munir, Yousaf Ali Khan.

**Software:** Mubbasher Munir.

**Supervision:** Yueying Wang, Hafeez ur Rehman.

**Validation:** Muhammad Ghulam Shabeer.

**Visualization:** Noman Arshed.

**Writing – original draft:** Yueying Wang, Mubbasher Munir, Yousaf Ali Khan.

**Writing – review & editing:** Noman Arshed, Muhammad Ghulam Shabeer, Mubbasher Munir, Hafeez ur Rehman.

## References

1. McAdams DP, Pals JL. A new Big Five: Fundamental principles for an integrative science of personality. *American Psychologist*. 2006; 61: 204–217. <https://doi.org/10.1037/0003-066X.61.3.204> PMID: 16594837
2. Albuquerque I, de Lima MP, Matos M, Figueiredo C. The Interplay Among Levels of Personality: The Mediator Effect of Personal Projects Between the Big Five and Subjective Well-Being. *Journal of Happiness Studies*. 2012; 14: 235–250. <https://doi.org/10.1007/s10902-012-9326-6>
3. Luhmann M, Hawkey LC, Cacioppo JT. Thinking About One's Subjective Well-Being: Average Trends and Individual Differences. *J Happiness Stud*. 2014; 15: 757–781. <https://doi.org/10.1007/s10902-013-9448-5> PMID: 25332682
4. Soto CJ. Is Happiness Good for Your Personality? Concurrent and Prospective Relations of the Big Five With Subjective Well-Being. *Journal of Personality*. 2014; 83: 45–55. <https://doi.org/10.1111/jopy.12081> PMID: 24299053
5. Suldo SM, Minch D R., Hearon BV. Adolescent Life Satisfaction and Personality Characteristics: Investigating Relationships Using a Five Factor Model. *Journal of Happiness Studies*. 2014; 16: 965–983. <https://doi.org/10.1007/s10902-014-9544-1>
6. Kirkland T, Gruber J, Cunningham WA. Comparing Happiness and Hypomania Risk: A Study of Extraversion and Neuroticism Aspects. *PLoS One*. 2015; 10: e0132438–e0132438. <https://doi.org/10.1371/journal.pone.0132438> PMID: 26161562
7. Kashdan TB, Biswas-Diener R, King LA. Reconsidering happiness: the costs of distinguishing between hedonics and eudaimonia. *The Journal of Positive Psychology*. 2008; 3: 219–233. <https://doi.org/10.1080/17439760802303044>
8. Diener E, Emmons RA, Larsen RJ, Griffin S. The Satisfaction With Life Scale. *Journal of Personality Assessment*. 1985; 49: 71–75. [https://doi.org/10.1207/s15327752jpa4901\\_13](https://doi.org/10.1207/s15327752jpa4901_13) PMID: 16367493
9. Watson D, Clark LA, Tellegen A. Development and validation of brief measures of positive and negative affect: The PANAS scales. *Journal of Personality and Social Psychology*. 1988; 54: 1063–1070. <https://doi.org/10.1037//0022-3514.54.6.1063> PMID: 3397865
10. Lyubomirsky S, Lepper HS. Social Indicators Research. 1999; 46: 137–155. <https://doi.org/10.1023/a:1006824100041>
11. Mizobuchi H. Measuring world better life frontier: a composite indicator of OECD better life index. *Social Indicators Research*. 2014; 118: 987–1007.

12. Helliwell JF, Layard R, Sachs JD, Neve JD, Akinin LB, Wang S. World Happiness Report. 2023. <https://happiness-report.s3.amazonaws.com/2023/WHR+23.pdf>
13. Ryff CD. Happiness is everything, or is it? Explorations on the meaning of psychological well-being. *Journal of Personality and Social Psychology*. 1989; 57: 1069–1081. <https://doi.org/10.1037/0022-3514.57.6.1069>
14. Keyes CLM. Social Well-Being. *Social Psychology Quarterly*. 1998; 61: 121. <https://doi.org/10.2307/2787065>
15. Diener ED. *The Science of Wellbeing. The collected words of Ed Diener*. Springer; 2009.
16. Seligman MEP, Csikszentmihalyi M. *Positive Psychology: An Introduction. Flow and the Foundations of Positive Psychology*. 2014; 279–298. [https://doi.org/10.1007/978-94-017-9088-8\\_18](https://doi.org/10.1007/978-94-017-9088-8_18)
17. Easterlin RA. Does economic growth improve the human lot? Some empirical evidence. *Nations and households in economic growth*. Academic Press; 1974. pp. 89–125.
18. Arshed N, Arif A, Abbas RZ, Hameed K. Comparing quality of institutions with happiness of Asian people. *Studies in Applied Economics*. 2021; 39: 1–22.
19. Inglehart R. *Culture shift in advanced industrial society*. Princeton: Princeton University Press; 1990.
20. Veenhoven R. Is happiness relative? *Social Indicators Research*. 1991; 24: 1–37.
21. Graham C, Pettinato S. Frustrated achievers: winners, losers and subjective well-being in a new market economies. *Journal of Development Studies*. 2002; 38: 100–140.
22. Blanchflower DG, Oswald AJ. Well-being over time in Britain and the USA. *Journal of Public Economics*. 2004; 88: 1359–1386.
23. Shields MA, Price SW. Exploring the economic and social determinants of psychological well-being and perceived social support in England. *Journal of the Royal Statistical Society Series A: Statistics in Society*. 2005; 168: 513–537.
24. Lelkes O. Tasting freedom: happiness, religion and economic transition. *Journal of Economic Behavior & Organization*. 2006; 59: 173–94.
25. Deaton A. Income, health, and well-being around the world: Evidence from the Gallup World Poll. *Journal of Economic Perspectives*. 2008; 22: 53–72. <https://doi.org/10.1257/jep.22.2.53> PMID: 19436768
26. Stevenson B, Wolfers J. Economic Growth and subjective well-being: Reassessing the Easterlin paradox. *National Bureau of Economic Research*. 2008;w14282.
27. Tella RD, MacCulloch R. Some Uses of Happiness Data in Economics. *Journal of Economic Perspectives*. 2006; 20: 25–46. <https://doi.org/10.1257/089533006776526111>
28. Frey BS, Stutzer A. What can economists learn from happiness research? *Journal of Economic Literature*. 2002; 40: 402–435.
29. Kahneman D, Kruger AB, Schkade D, Schwarz N, Stone AA. Would you be happier if you were richer? A focusing illusion. *Science*. 2006; 312: 1908–1910.
30. Usman M, Balsalobre-Lorente D. Environmental concern in the era of industrialization: Can financial development, renewable energy and natural resources alleviate some load? *Energy Policy*. 2022; 162: 112780. <https://doi.org/10.1016/j.enpol.2022.112780>
31. Jahanger A, Hossain MR, Usman M, Chukwuma Onwe J. Recent scenario and nexus between natural resource dependence, energy use and pollution cycles in BRICS region: Does the mediating role of human capital exist? *Resources Policy*. 2023; 81: 103382. <https://doi.org/10.1016/j.resourpol.2023.103382>
32. Adebayo TS, Pata UK, Akadiri SS. A comparison of CO2 emissions, load capacity factor, and ecological footprint for Thailand's environmental sustainability. *Environment, Development and Sustainability*. 2022. <https://doi.org/10.1007/s10668-022-02810-9>
33. Saqib N, Ozturk I, Usman M, Sharif A, Razzaq A. Pollution Haven or Halo? How European countries leverage FDI, energy, and human capital to alleviate their ecological footprint. *Gondwana Research*. 2023; 116: 136–148. <https://doi.org/10.1016/j.gr.2022.12.018>
34. Wackernagel M, Rees W. *Our ecological footprint: reducing human impact on the earth*. New Society Publisher; 1998.
35. Veenhoven R. Happiness as a public policy aim: The greatest happiness principle. *Positive Psychology in Practice*. 2004; 658–678.
36. Graham C. *Globalization, Poverty, Inequality and Insecurity: Some Insights from the Economics of Happiness. The Impact of Globalization on the World's Poor*. 2007; 235–270.
37. Aaker JL, Rudd M, Mogilner C. If money does not make you happy, consider time. *Journal of Consumer Psychology*. 2011; 21: 126–130.



38. O'Brien C. Sustainable happiness: How happiness studies can contribute to a more sustainable future. *Canadian Psychology / Psychologie canadienne*. 2008; 49: 289–295. <https://doi.org/10.1037/a0013235>
39. Caldas SB. The happiness-to-consumption ratio: an alternative approach in the quest for happiness. *Estudios Gerenciales*. 2010; 26: 15–35. [https://doi.org/10.1016/s0123-5923\(10\)70121-2](https://doi.org/10.1016/s0123-5923(10)70121-2)
40. Rasheed F, Rauf SA, Ahmad E. Happiness in Solow Growth Model. MPRA paper no 43400. 2011; 127–144.
41. Verhofstadt E, Van Ootegem L, Defloor B, Bleys B. Linking individuals' ecological footprint to their subjective well-being. *Ecological Economics*. 2016; 127: 80–89. <https://doi.org/10.1016/j.ecolecon.2016.03.021>
42. Ambrey CL, Daniels P. Happiness and footprints: assessing the relationship between individual well-being and carbon footprints. *Environment, Development and Sustainability*. 2016; 19: 895–920. <https://doi.org/10.1007/s10668-016-9771-1>
43. Quak D, Luetz JM. Human Happiness: Conceptual and Practical Perspectives. *Encyclopedia of the UN Sustainable Development Goals*. 2020; 1–16.
44. Alves-Pinto MJ, Giannetti BF. Sustainable Universities: A Comparison of the Ecological Footprint, Happiness and Academic Performance Among Students of Different Courses. *Sustainability on University Campuses: Learning, Skills Building and Best Practices*. 2019; 209–225.
45. Wu X. Exploring association between subjective wellbeing and ecological footprint: Panel data analysis. Texas State University. 2020. [digital.library.txstate.edu/handle/10877/9854](https://digital.library.txstate.edu/handle/10877/9854)
46. Zhang J, Zhan FB, Wu X, Zhang D. Partial Correlation Analysis of Association between Subjective Well-Being and Ecological Footprint. *Sustainability*. 2021; 13: 1033. <https://doi.org/10.3390/su13031033>
47. Salvatore D. *Introduction to international economics*. Wiley; 2012.
48. Sakurai R. Preserving national identity and fostering happiness in the era of globalization: A comparative exploration of values and moral education in Bhutan and Japan. *Journal of International Cooperation in Education*. 2011; 14: 169–188.
49. Freeman KA, Jackson KC. In pursuit of happiness, Bhutan opens to globalization and business. *International Journal of Business and Social Research*. 2012; 2: 132–143.
50. Lin CHA, Lahiri S, Hsu CP. Happiness and globalization: A spatial econometric approach. *Journal of Happiness Studies*. 2017; 18: 1841–1857.
51. Sajjad M, Irfan M, Humayon AA, Khan RA. Felicidad y globalización: un estudio en perspectiva global sobre el emprendimiento. *Religación Revista de Ciencias Sociales y Humanidades*. 2019; 4: 36–43.
52. Bauman Z. On glocalization: or globalization for some, localization for others. *Thesis Eleven*. 1998; 54: 37–49.
53. Tomlinson J. *Globalization and Culture*. University of Chicago Press; 1999.
54. O'Rourke KH, Williamson JG. *Globalization and history*. Globalization and History. MIT Press; 1999.
55. Castles S, Davidson A. *Citizenship and migration: Globalization and the politics of belonging*. Psychology Press; 2000.
56. Inglehart R. Globalization and postmodern values. *Washington Quarterly*. 2000; 23: 215–228.
57. Giddens A. *Runaway world: How globalization is reshaping our lives*. Taylor & Francis; 2003.
58. Lee JW, Tai S. Impacts of globalization on subculture and consumer happiness in a transition economy. *Papers on the New Marketing, E-Commerce, Innovation and Small Business Management*. 2005; 4.
59. Stiglitz J. The future of globalization. *The future of globalization: Explorations in light of recent turbulence*. 2007.
60. Gorniak-Kochikowska K. ICT, globalization and the pursuit of happiness: the problem of change. *ETHI-COMP2007*. 2007.
61. Hummels D. Transportation costs and international trade in the second era of globalization. *Journal of Economic Perspectives*. 2007; 21: 131–154.
62. Zhao Y. *Catching up or leading the way: American education in the age of globalization*. ASCD; 2009.
63. Blommaert J. *The sociolinguistics of globalization*. Cambridge University Press; 2010.
64. Holton RJ. *Globalization and the nation state*. Bloomsbury Publishing; 2011.
65. Tashimova FS, Rizulla AR. Features of virtual subjects influence on creative adaptation and experiences of youth happiness in globalization conditions. *Intercultural mutual relations in Kazakhstan in the globalization process*. Almaty; 2011. pp. 149–156.
66. Lee PM. *Forgetting the art world*. MIT Press; 2012.

67. Spring J. Globalization of education: An introduction. Routledge; 2014.
68. Fukuyama F. Political order and political decay. Industrial revolution to the globalization of democracy. Macmillan; 2014.
69. Amin S. Capitalism in the age of globalization: The management of contemporary society. Bloomsbury Publishing; 2014.
70. Enloe C. Globalization and militarism: Feminists make the link. Rowman & Littlefield; 2016.
71. Steger MB. Globalization: A very short introduction. Oxford University Press; 2017.
72. Seidlinger MJ. In the Ministry of Utmost Happiness. Globalization is built on bodies. *Electric Lit*. 2017; 24.
73. Beck U. What is globalization. John Wiley & Sons; 2018.
74. Jermittiparsert K, Sriyakul T. Determinants of quality education in Asian countries: Impact of social globalization, happiness and research and development. *Journal of Security & Sustainability Issues*. 2020; 9.
75. Makhdum MSA, Usman M, Kousar R, Cifuentes-Faura J, Radulescu M, Balsalobre-Lorente D. How Do Institutional Quality, Natural Resources, Renewable Energy, and Financial Development Reduce Ecological Footprint without Hindering Economic Growth Trajectory? Evidence from China. *Sustainability*. 2022; 14: 13910. <https://doi.org/10.3390/su142113910>
76. Leprince-ringuet L. Energy and Happiness. *Studies in Environmental Science*. 1982; 679–689.
77. Afia NB. The relationship between energy consumption, economic growth and happiness. *Journal of Economic Development*. 2019; 44: 41–57.
78. Aldieri L, Bruno B, Vinci CP. Does environmental innovation make us happy? An empirical investigation. *Socio-Economic Planning Sciences*. 2019; 67: 166–172. <https://doi.org/10.1016/j.seps.2018.10.008>
79. Pata UK, Kartal MT. Impact of nuclear and renewable energy sources on environment quality: Testing the EKC and LCC hypotheses for South Korea. *Nuclear Engineering and Technology*. 2023; 55: 587–594. <https://doi.org/10.1016/j.net.2022.10.027>
80. Pata UK, Kartal MT, Erdogan S, Sarkodie SA. The role of renewable and nuclear energy R&D expenditures and income on environmental quality in Germany: Scrutinizing the EKC and LCC hypotheses with smooth structural changes. *Applied Energy*. 2023; 342: 121138. <https://doi.org/10.1016/j.apenergy.2023.121138>
81. Pata UK. Renewable and non-renewable energy consumption, economic complexity, CO2 emissions, and ecological footprint in the USA: testing the EKC hypothesis with a structural break. *Environmental Science and Pollution Research*. 2020; 28: 846–861. <https://doi.org/10.1007/s11356-020-10446-3> PMID: 32827117
82. Malthus TR. An Essay on the Principle of Population. 1982.
83. Pankaj P, Dorji T. Measuring individual happiness in relation to Gross National Happiness in Bhutan: Some preliminary results from survey data. First International Conference on Operationalization of Gross National Happiness. Thimphu: Center for Bhutan Studies; 2004. pp. 375–389.
84. Berry BJL, Okulicz-Kozaryn A. An Urban-Rural Happiness Gradient. *Urban Geography*. 2011; 32: 871–883. <https://doi.org/10.2747/0272-3638.32.6.871>
85. Jiang S, Lu M, Sato H. Identity, Inequality, and Happiness: Evidence from Urban China. *World Development*. 2012; 40: 1190–1200. <https://doi.org/10.1016/j.worlddev.2011.11.002>
86. Easterlin RA, Sawangfa O. Happiness and Domain Satisfaction: New Directions for the Economics of Happiness. *Happiness, Economics and Politics*. 2009. <https://doi.org/10.4337/9781849801973.00010>
87. Burger MJ, Morrison PS, Hendriks M, Hoogerbrugge MM. Urban-rural happiness differentials across the world. 2020 pp. 66–93.
88. Engelbrecht H. The (Un)Happiness of Knowledge and the Knowledge of (Un)Happiness: Happiness Research and Policies for Knowledge-based Economies 1. *Prometheus*. 2007; 25: 243–266. <https://doi.org/10.1080/08109020701531379>
89. Hojman DE. Getting Innovation Right: The Key to Happiness and Flourishing? *Homo Oeconomicus*. 2016; 33: 311–316. <https://doi.org/10.1007/s41412-016-0016-1>
90. Maurseth PB. ICT, Growth and Happiness. *Digitalisation and Development*. 2019; 31–86. [https://doi.org/10.1007/978-981-13-9996-1\\_2](https://doi.org/10.1007/978-981-13-9996-1_2)
91. Shamsi RSHA Ameen AA, Isaac O Al-Shibami AH, Khalifa GS. The impact of innovation and smart government on happiness: Proposing conceptual framework. *International Journal of Management and Human Science*. 2018; 2: 10–26.

92. Happiness Mochón F. and Technology: Special Consideration of Digital Technology and Internet. *International Journal of Interactive Multimedia and Artificial Intelligence*. 2018; 5: 162. <https://doi.org/10.9781/ijimai.2018.12.004>
93. Wadhwa V, Palvia S. Is information technology hacking our happiness? *Journal of Information Technology Case and Application Research*. 2018; 20: 151–157. <https://doi.org/10.1080/15228053.2018.1560954>
94. Aldieri L, Bruno B, Vinci CP. A multi-dimensional approach to happiness and innovation. *Applied Economics*. 2021; 53: 1300–1310.
95. Usman M, Radulescu M. Examining the role of nuclear and renewable energy in reducing carbon footprint: Does the role of technological innovation really create some difference? *Science of The Total Environment*. 2022; 841: 156662. <https://doi.org/10.1016/j.scitotenv.2022.156662> PMID: 35718170
96. Usman M, Balsalobre-Lorente D, Jahanger A, Ahmad P. Are Mercosur economies going green or going away? An empirical investigation of the association between technological innovations, energy use, natural resources and GHG emissions. *Gondwana Research*. 2023; 113: 53–70. <https://doi.org/10.1016/j.gr.2022.10.018>
97. Lanre Ibrahim R, Bello Ajide K, Usman M, Kousar R. Heterogeneous effects of renewable energy and structural change on environmental pollution in Africa: Do natural resources and environmental technologies reduce pressure on the environment? *Renewable Energy*. 2022; 200: 244–256. <https://doi.org/10.1016/j.renene.2022.09.134>
98. Wang R, Usman M, Radulescu M, Cifuentes-Faura J, Balsalobre-Lorente D. Achieving ecological sustainability through technological innovations, financial development, foreign direct investment, and energy consumption in developing European countries. *Gondwana Research*. 2023; 119: 138–152. <https://doi.org/10.1016/j.gr.2023.02.023>
99. Hameed K, Arshed DN, Yazdani DN, Munir M. On Globalization and Business Competitiveness: A Panel Data Country Classification. *Studies of Applied Economics*. 2021; 39. <https://doi.org/10.25115/eea.v39i2.3586>
100. Arshed N, Anwar A, Kousar N, Bukhari S. Education enrollment and income inequality: A case of SAARC economies. *Social Indicators Research*. 2018; 140: 1211–1224.
101. Wackernagel M, Onisto L, Bello P, Callejas Linares A, Susana López Falfán I, Méndez García J, et al. National natural capital accounting with the ecological footprint concept. *Ecological Economics*. 1999; 29: 375–390. [https://doi.org/10.1016/s0921-8009\(98\)90063-5](https://doi.org/10.1016/s0921-8009(98)90063-5)
102. Easterlin RA, Angelescu L. Happiness and growth the world over: Time series evidence on the happiness-income paradox. IZA Discussion Paper no 4060. 2009.
103. Easterlin RA, McVey LA, Switek M, Sawangfa O. The happiness-income paradox revisited. *National Academy of Sciences*. 2010. pp. 22463–22468.
